# Supplementary material for: Using ZnCo2O4 Nanoparticles as the Hole Transport Layer to Improve Long-Term Stability of Perovskite Solar Cells
Source: Research Square preprint supplement (doi:10.21203/rs.3.rs-1145111/v1), 2021-12-09
Supplement: Supplementary file 1 [file ed90fccaf7dbe62c2a470f83.docx]

**Supplementary Information**

**Using ZnCo2O4 nanoparticles as the hole transport layer to improve long-term stability of perovskite solar cells**

Bo-Rong Jheng,1 Pei-Ting Chiu,1,2 Sheng-Hsiung Yang,1,* and Yung-Liang Tong2

*1Institute of Lighting and Energy Photonics, College of Photonics, National Yang Ming Chiao Tung University, No.301, Section 2, Gaofa 3rd Road, Guiren District, Tainan 71150, Taiwan R.O.C.*

*2Green Energy and Environment Research Laboratories, Industrial Technology Research Institute, No.360, Gaofa 2nd Road, Guiren District, Tainan 71150, R.O.C.*

*Correspondence: [yangsh@mail.nctu.edu.tw](mailto:yangsh@mail.nctu.edu.tw)

**Table S1.** Lifetime parameters of TR-PL curves of the perovskite on the FTO substrate, PEDOT:PSS film, and ZnCo2O4 NPs layer.

| substrate | A1 (%) | τ1 (ns) | A2 (%) | τ2 (ns) | τavg (ns) |
| --- | --- | --- | --- | --- | --- |
| FTO | 54.61 | 13.12 | 45.39 | 119.59 | 107.17 |
| PEDOT:PSS film | 58.51 | 11.74 | 41.49 | 101.19 | 88.61 |
| ZnCo2O4 NPs layer | 54.41 | 10.15 | 45.59 | 47.58 | 39.98 |


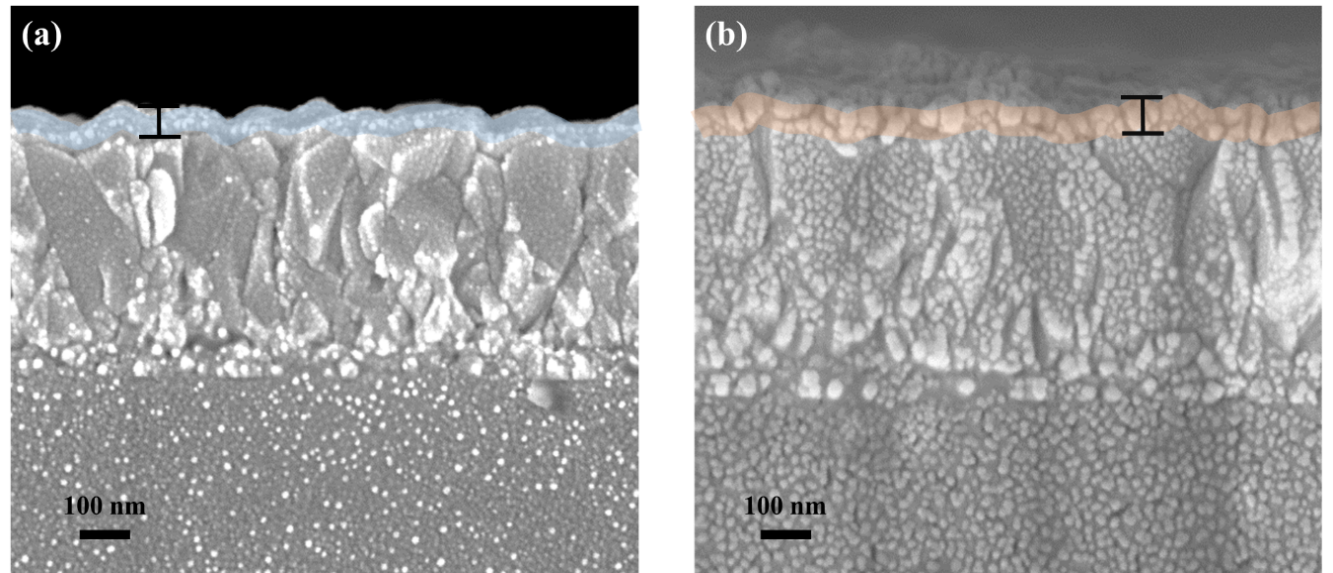


**Figure S1.** Cross-sectional SEM images of (a) PEDOT:PSS film and (b) ZnCo2O4 NPs layer deposited on FTO substrates.


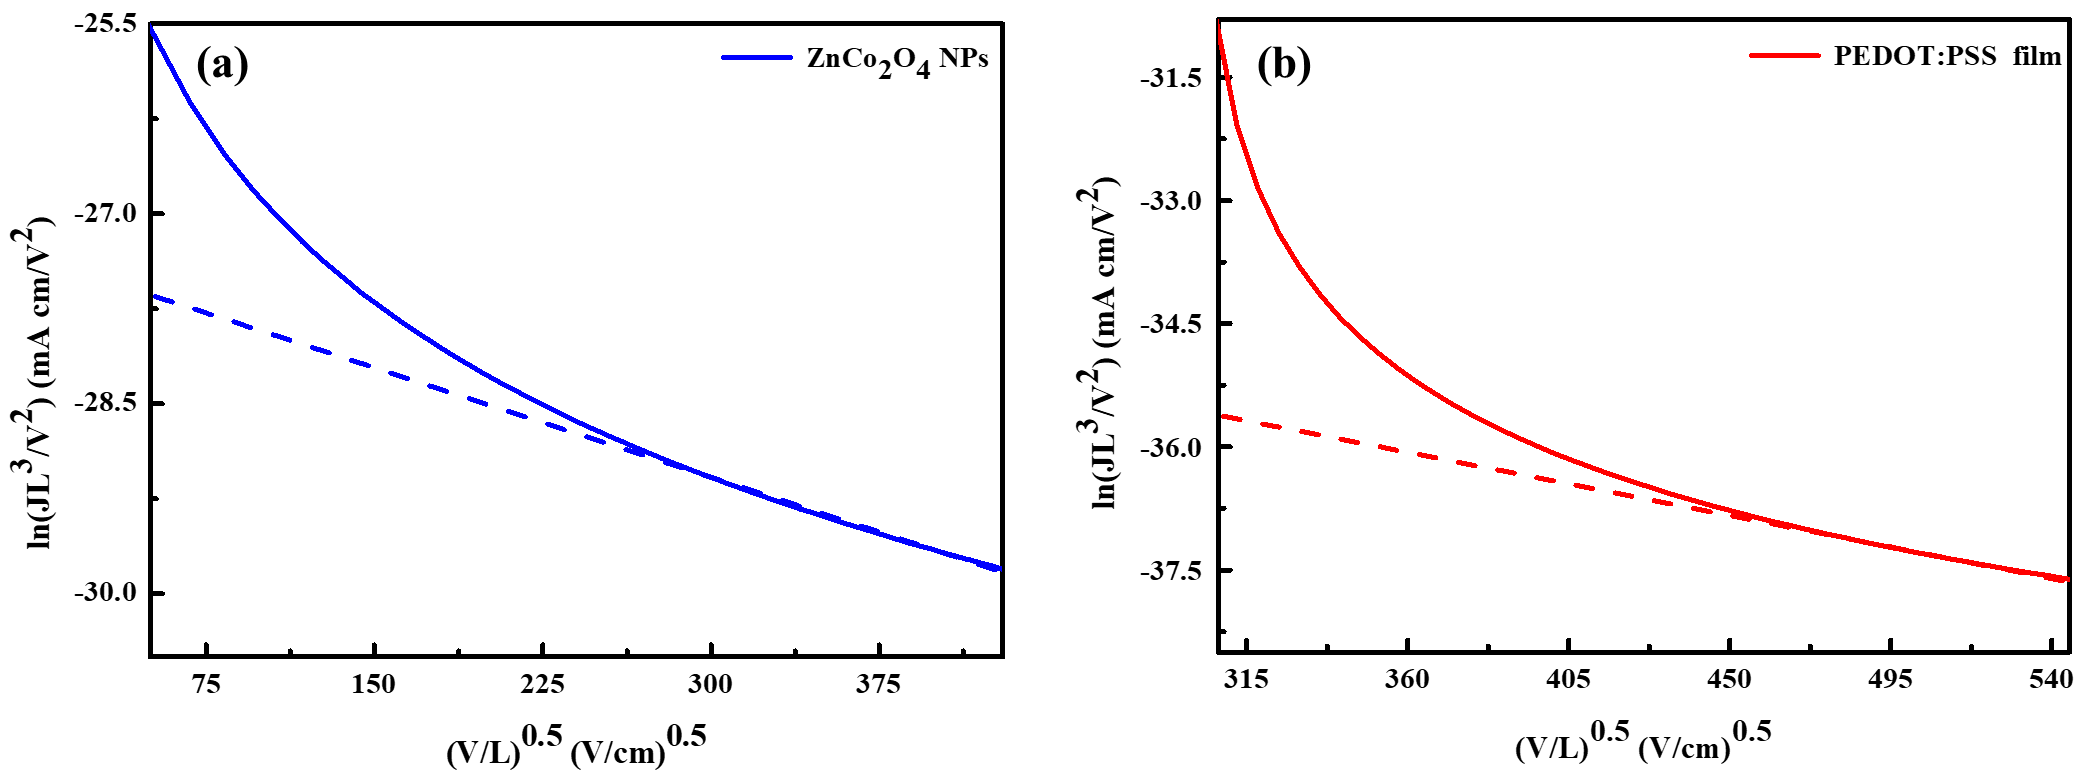


**Figure S2.** Hole mobility of (a) ZnCo2O4 NPs layer and (b) PEDOT:PSS film versus electric field (*V/L*)0.5.


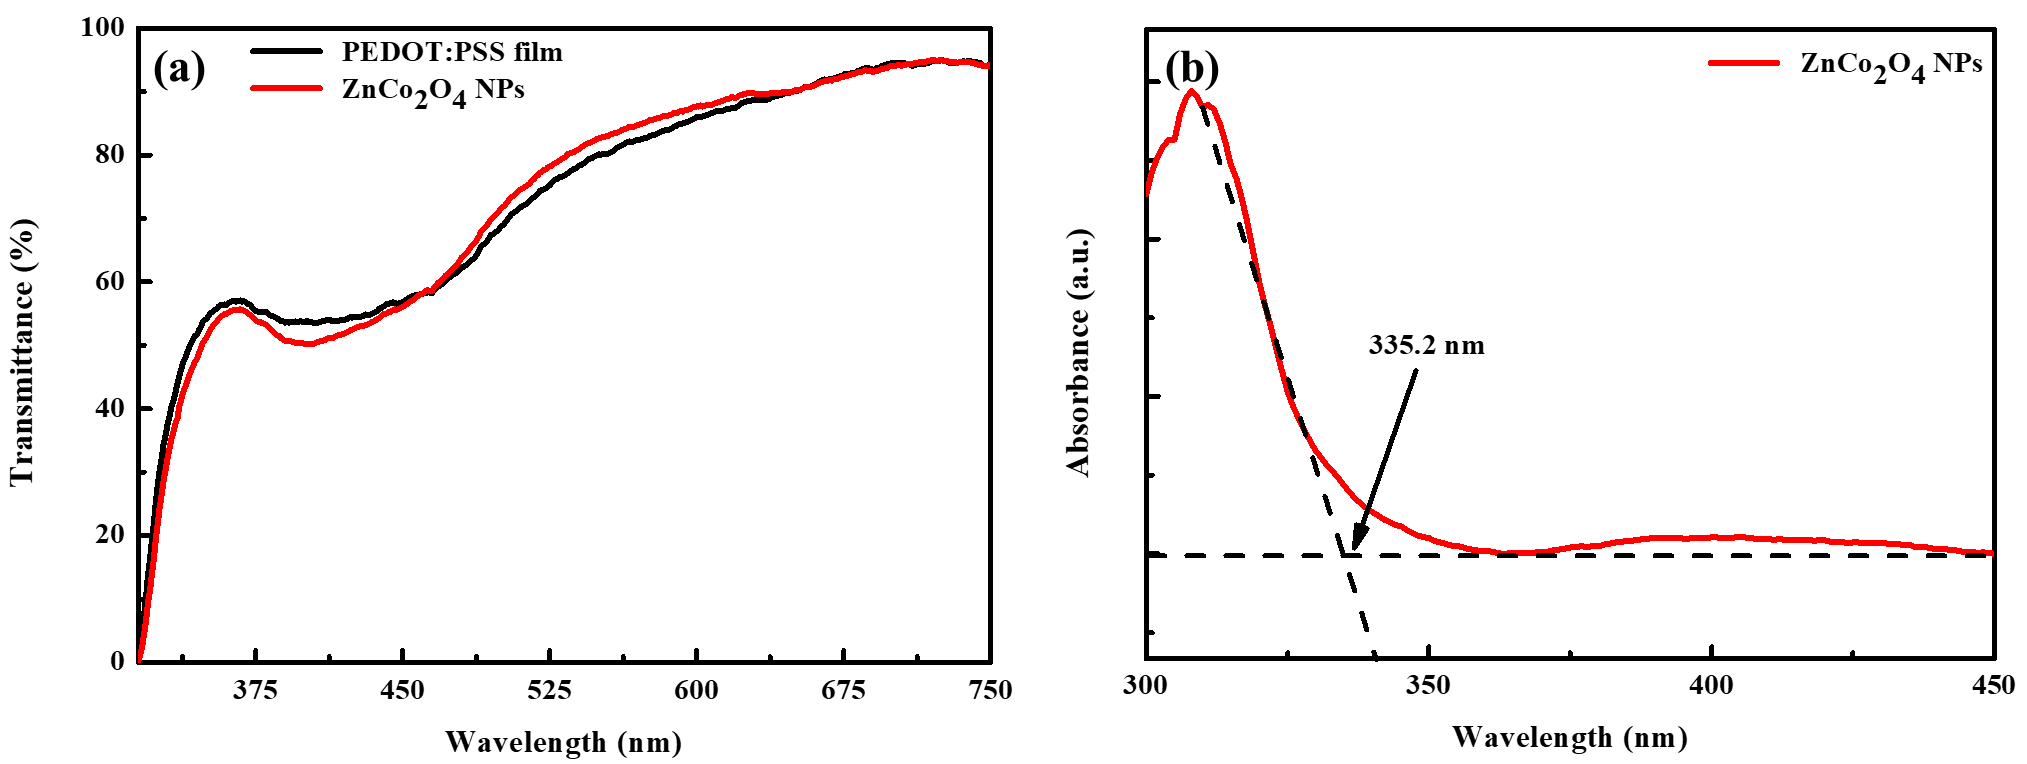


**Figure S3.** (a) Transmission spectra of PEDOT:PSS film and ZnCo2O4 NPs layer and (b) absorption spectra of ZnCo2O4 NPs layer.


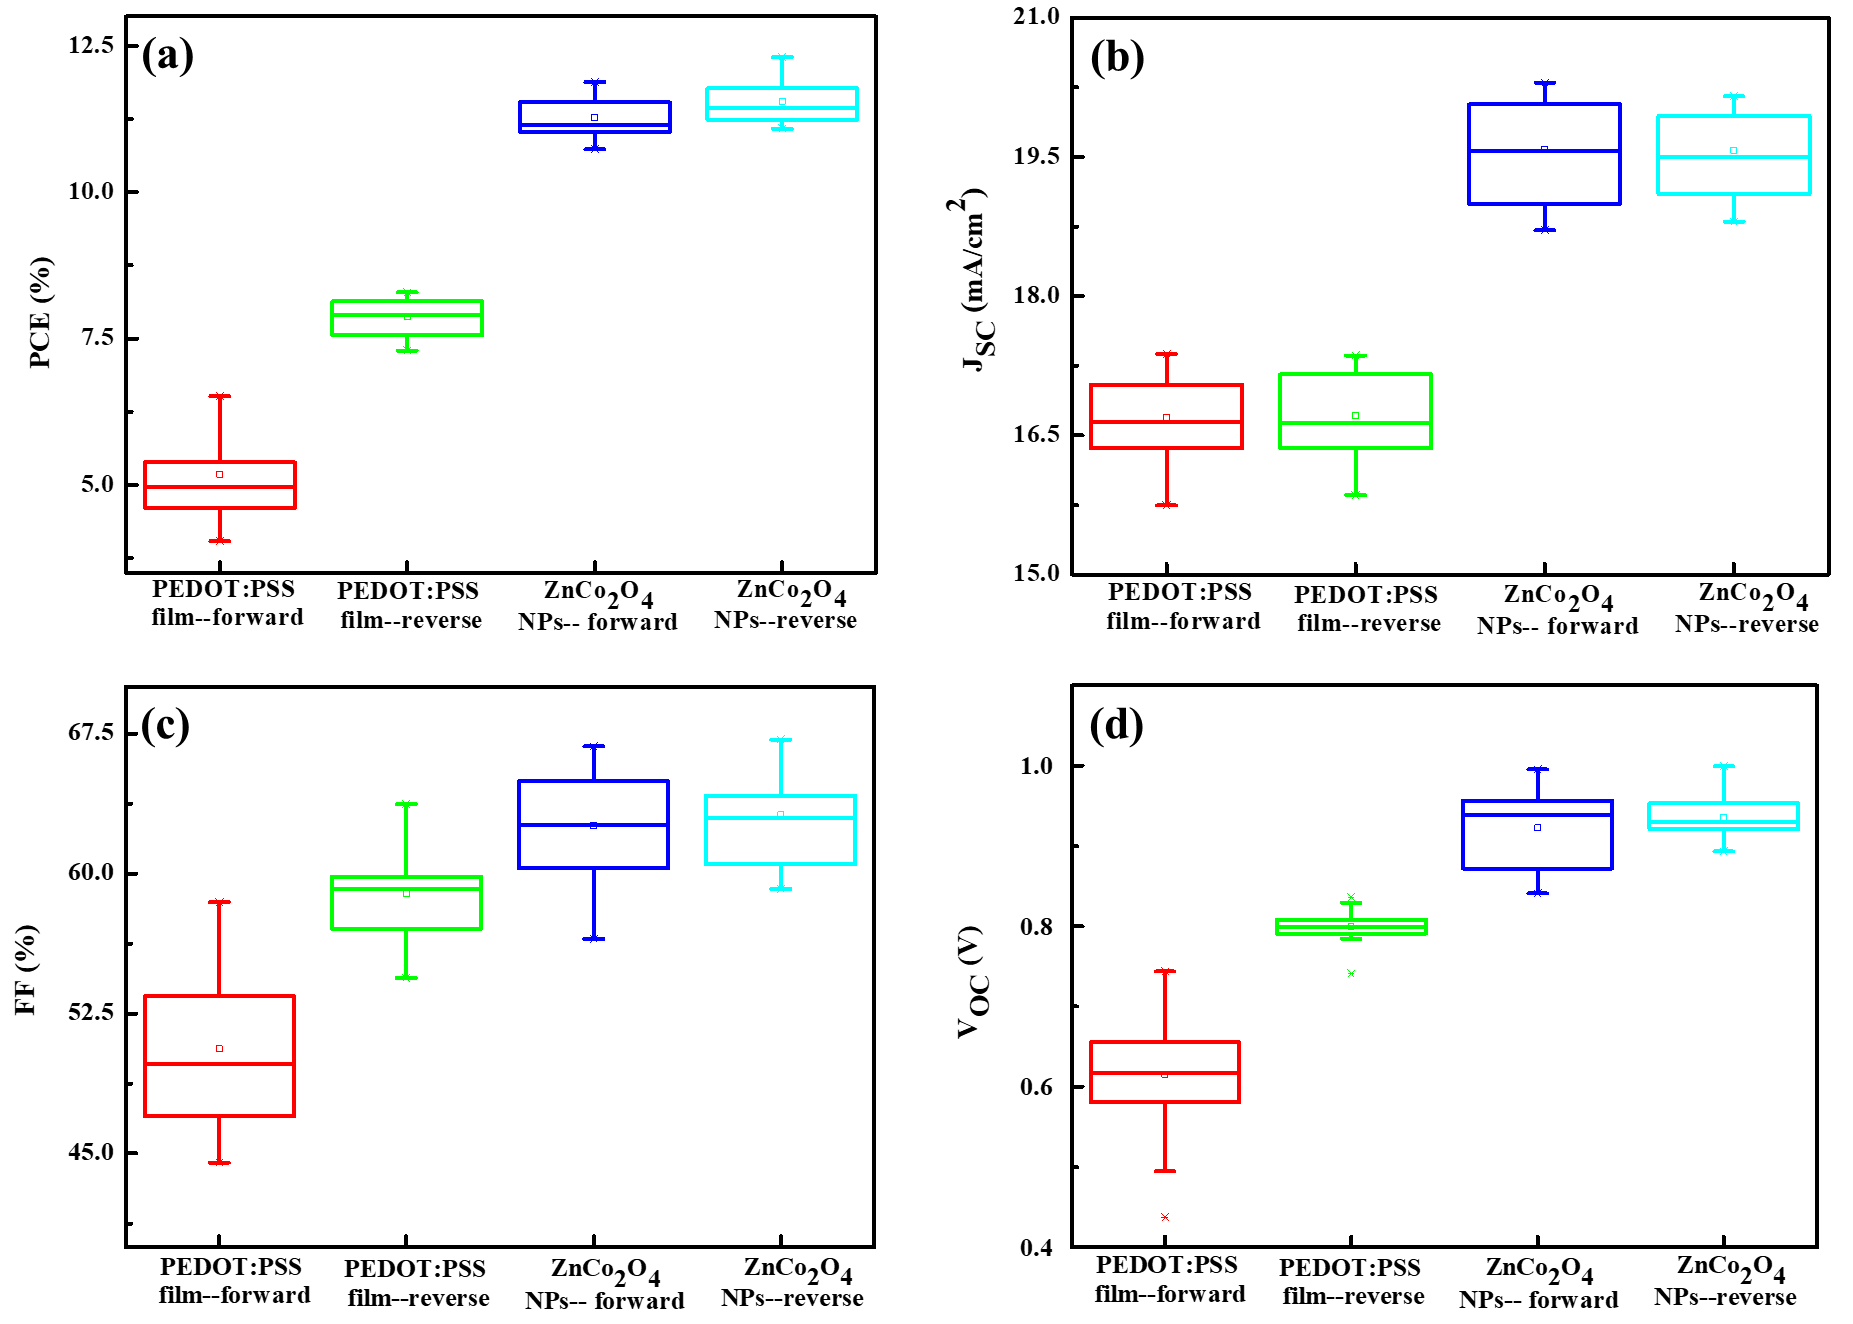


**Figure S4.** Performance variation represented as a standard box plot in (a) *PCE*, (b) *J*SC, (c) *FF*, and (d) *V*OC from 20 devices based on PEDOT:PSS film and ZnCo2O4 NPs layer under forward and reverse scans
